# Supplementary material
Source: PubMed Central journal article supplement (PMC7368144)

A

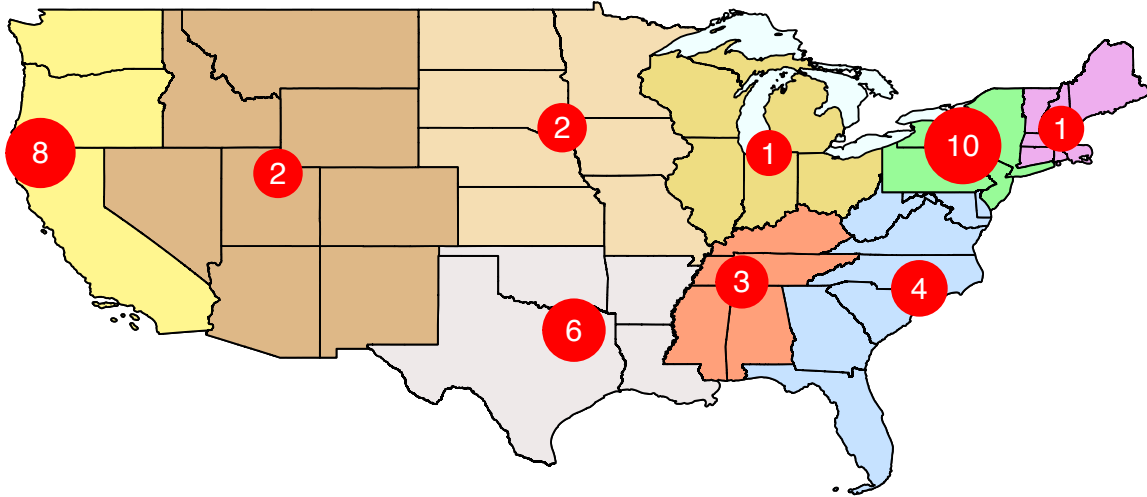

B

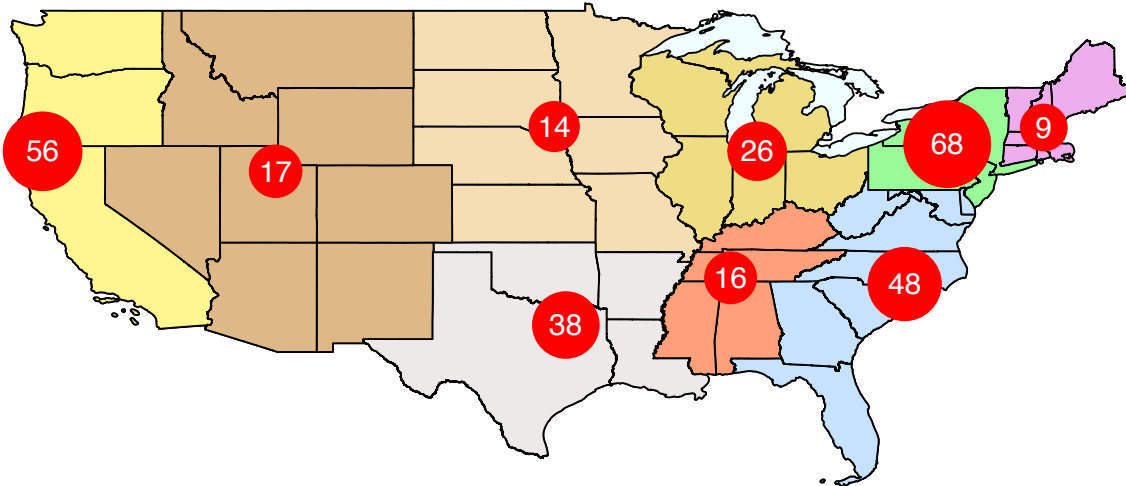

Supplement: NIHMS1590176-supplement-Supplement_Figure.pdf [file NIHMS1590176-supplement-Supplement_Figure.pdf]
